# Supplementary material
Source: PubMed Central journal article supplement (PMC6194292)
Supplement: PRO-27-1611-s001.pdf [file PRO-27-1611-s001.pdf]

steady-state CD spectra at 20 °C for gHH\_47(K28Q)

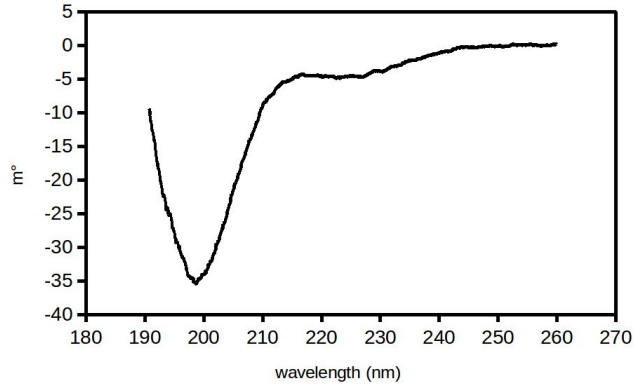

steady-state CD spectra at 20 °C for gHEEE\_06(L1)

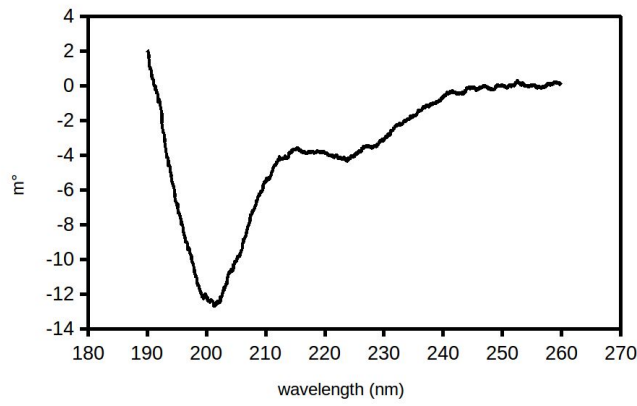

steady-state CD spectra at 20 °C for gHEEE\_06(L1+L2+L3)

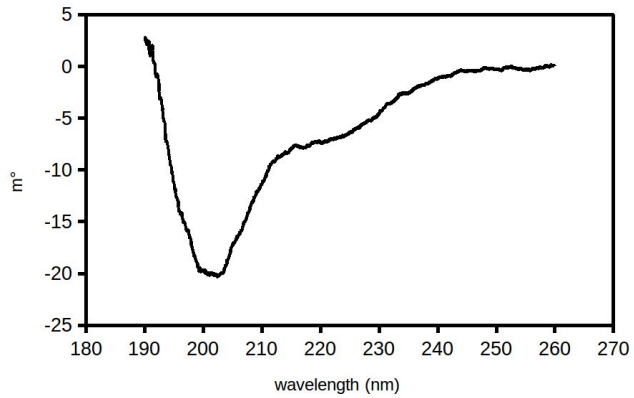

**Supplementary Figure 1.** Steady state circular dichroism spectra for re-designed peptides reveals random-coil structural signatures.
